# Supplementary material for: A Bayesian graph convolutional network for reliable prediction of molecular properties with uncertainty quantification
Source: PubMed Central journal article supplement — Chem Sci. 2019 Jul 22;10(36):8438–46. doi: 10.1039/c9sc01992h (PMC6839511; doi:10.1039/c9sc01992h), 2019-07-22

# Electronic Supplementary Information

*for*

## Bayesian graph convolutional network for reliable prediction of molecular properties with uncertainty quantification

*Seongok Ryu<sup>a</sup>, Yongchan Kwon<sup>b</sup> and Woo Youn Kim<sup>a,c</sup>*

<sup>a</sup>Department of Chemistry, KAIST, 291 Daehak-Ro, Yuseong-Gu, Daejeon, 34141, Republic  
of Korea

<sup>b</sup>Department of statistics, Seoul National University, 1 Gwanak-ro, Gwanak-gu, Seoul 08826,  
Republic of Korea

<sup>c</sup>KI for Artificial Intelligence, KAIST, 291 Daehak-ro, Yuseong-gu, Daejeon, Republic of  
Korea

# 1. Training details

## (1) The models in section 4.1

### 1) DUD-E dataset

\* Number of training data and time for training

|       | Number of samples |            |      | Time for training (s) |
|-------|-------------------|------------|------|-----------------------|
|       | Train             | Validation | Test |                       |
| egfr  | 25627             | 2847       | 7118 | 9887                  |
| tgfr1 | 6217              | 690        | 1726 | 2605                  |
| vgfr2 | 18259             | 2028       | 5071 | 7234                  |
| braf  | 7274              | 808        | 2020 | 3319                  |
| abl1  | 7872              | 874        | 2186 | 3581                  |

\* Accuracy & AUROC curve

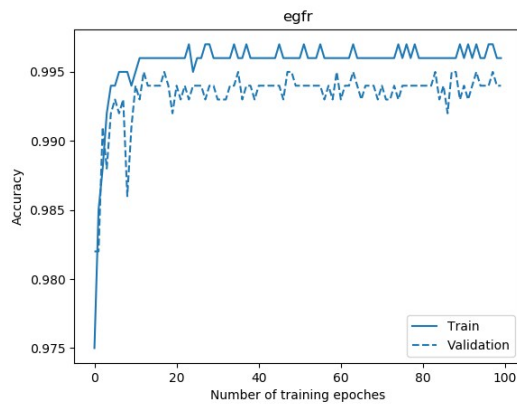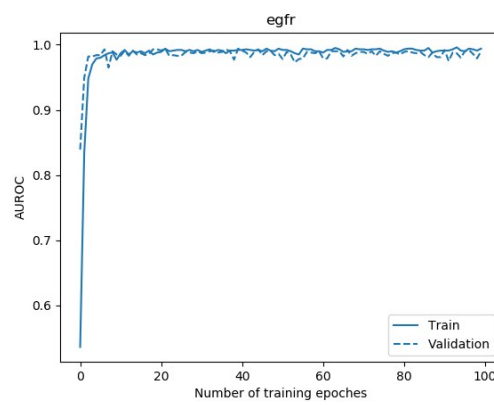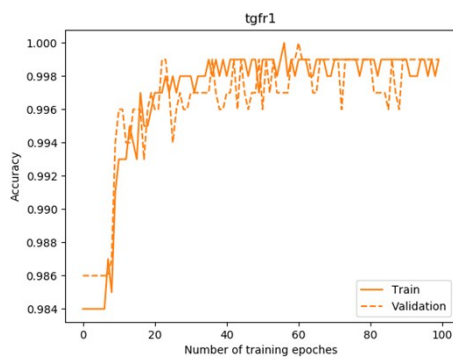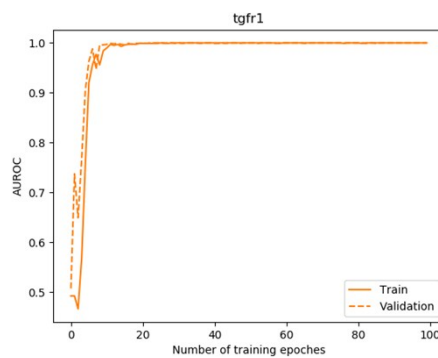

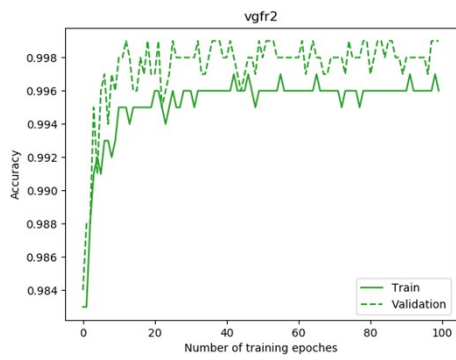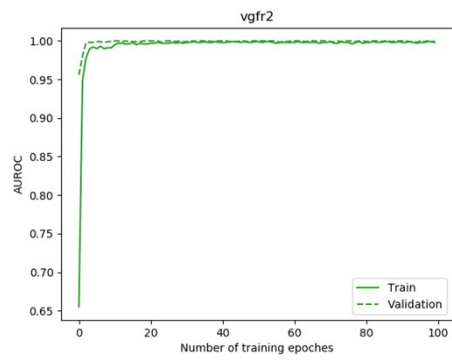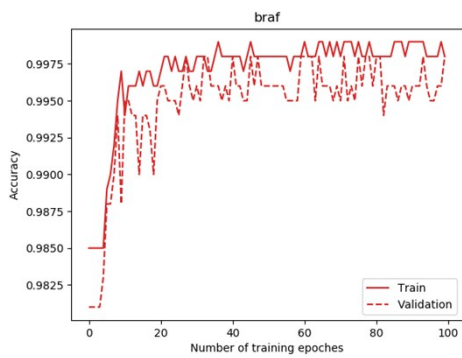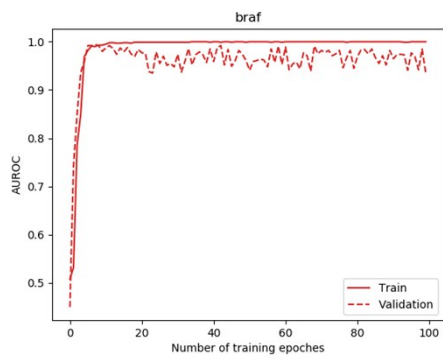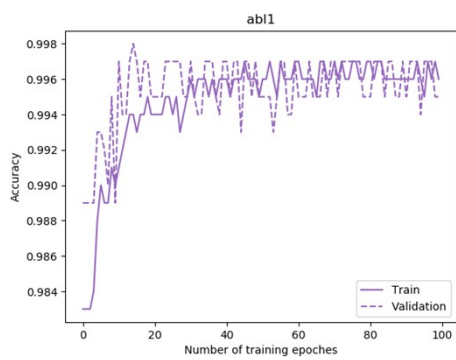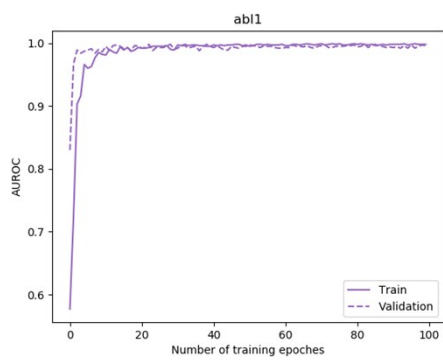

## 2) Tox-21 dataset

\* Number of training data and time for training

|               | Number of samples |            |      | Time for training (s) |
|---------------|-------------------|------------|------|-----------------------|
|               | Train             | Validation | Test |                       |
| nr-ahr        | 6481              | 720        | 1800 | 2680                  |
| nr-aromatase  | 5706              | 634        | 1585 | 2358                  |
| nr-ppar-gamma | 6489              | 721        | 1802 | 2644                  |
| sr-mmp        | 5801              | 644        | 1611 | 2439                  |
| sr-p53        | 6813              | 756        | 1892 | 2508                  |

\* Accuracy & AUROC curve

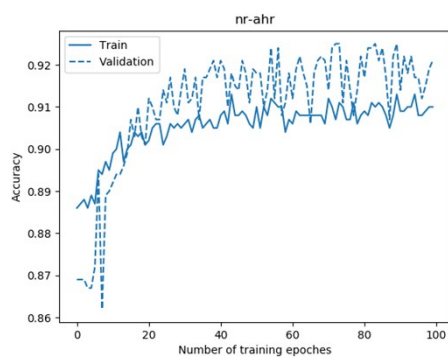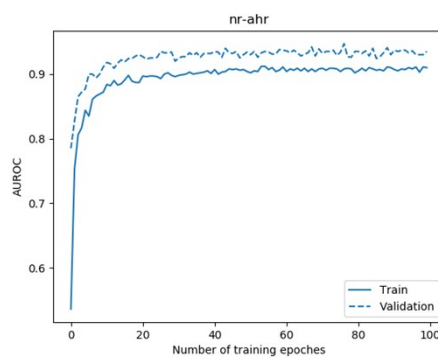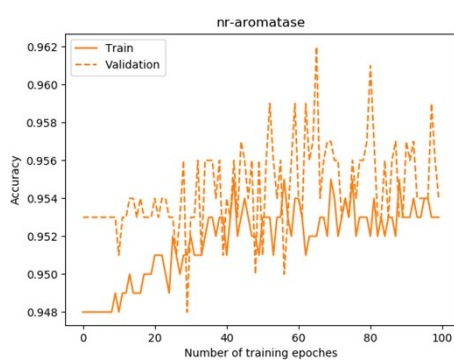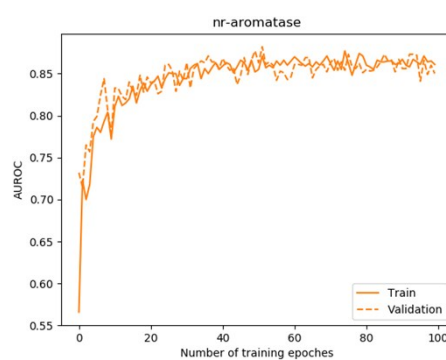

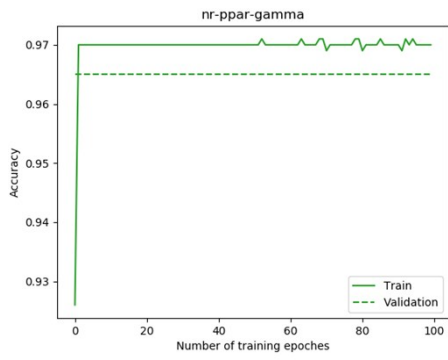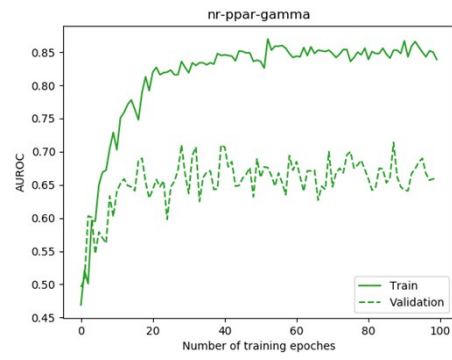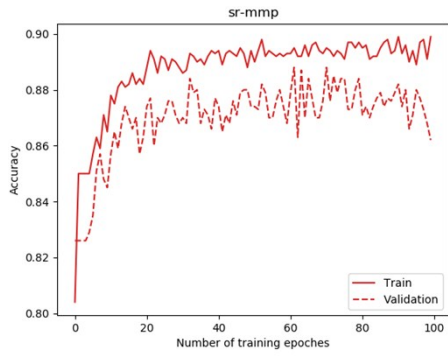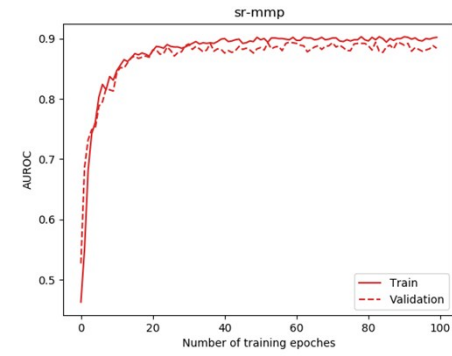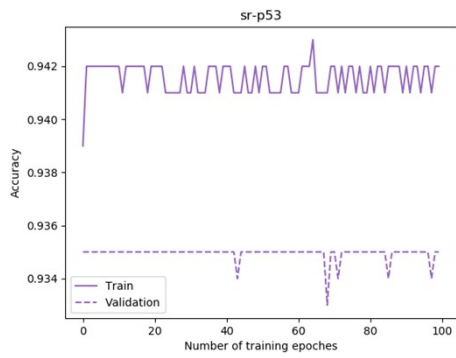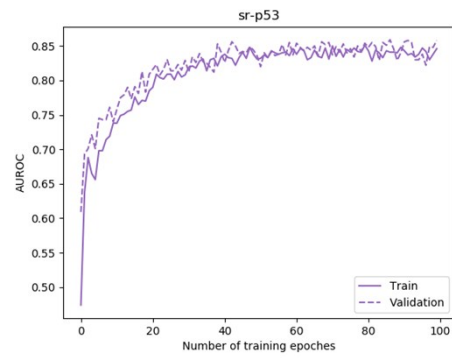

## (2) The models in section 4.3

### \* Number of training data and time for training

|                                   | Number of samples |            |       | Time for training (s) |
|-----------------------------------|-------------------|------------|-------|-----------------------|
|                                   | Train             | Validation | Test  |                       |
| $\sigma^2 = 0.25, 0.5, 0.75, 1.0$ | 97287             | 10809      | 27023 | $\sim 4 \times 10^4$  |

### \* Mean absolute error curve

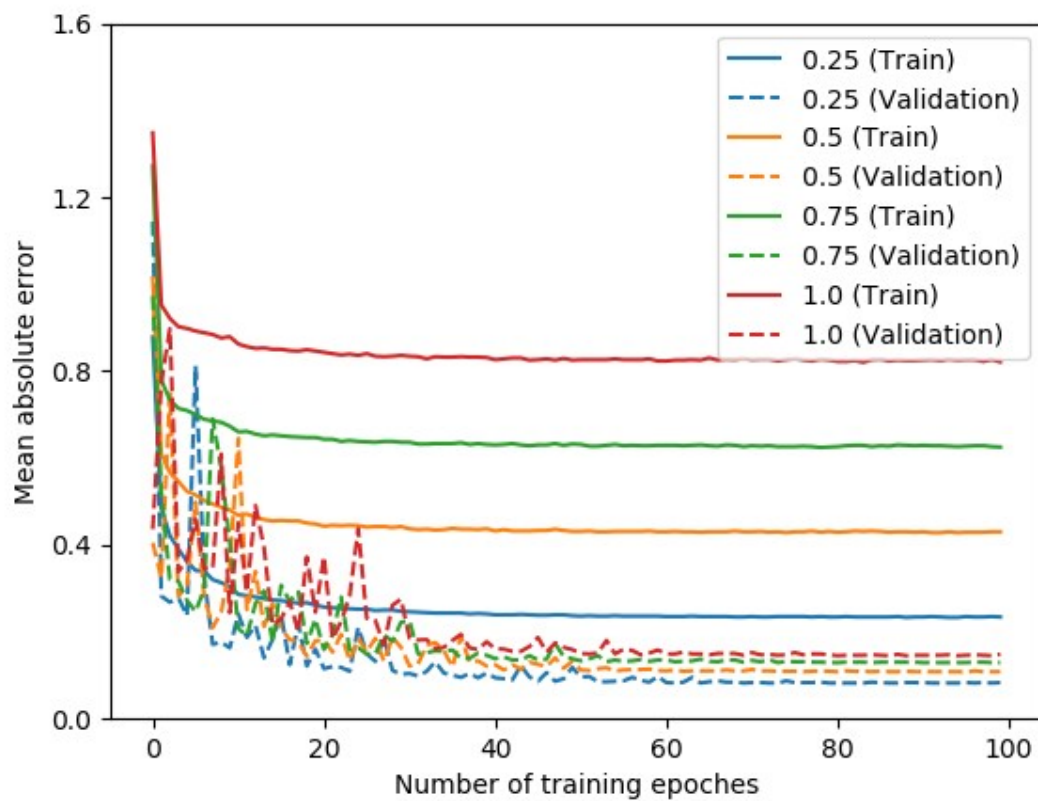

Note that we adjusted noise only for the training samples. (Therefore, the mean absolute error of training curves are shifted.)

### (3) The model in section 4.4

#### \* Number of training data and time for training

|   | Number of samples |            |      | Time for training (s) |
|---|-------------------|------------|------|-----------------------|
|   | Train             | Validation | Test |                       |
| - | 21585             | 2398       | 5995 | 8433                  |

#### \* Mean absolute error curve

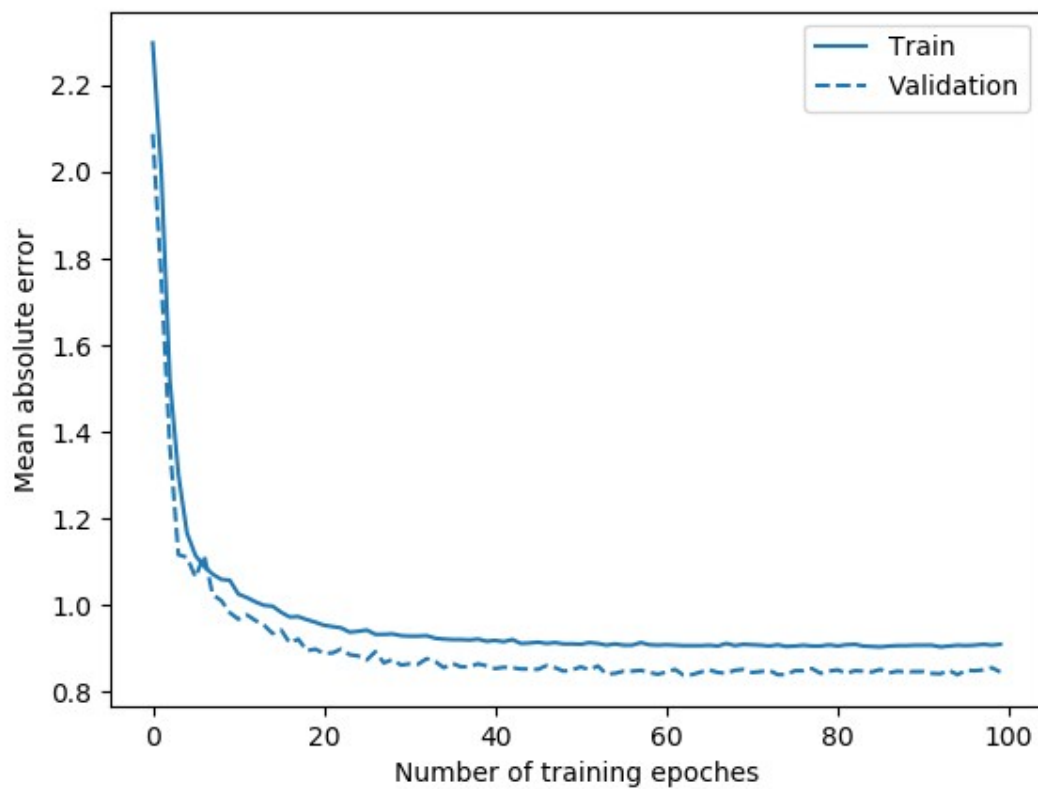

Supplement: SC-010-C9SC01992H-s001.pdf [file SC-010-C9SC01992H-s001.pdf]
